# Supplementary material for: One-pot imine synthesis from methylarenes and anilines under air over heterogeneous Cu oxide-modified CeO2 catalyst
Source: Royal Society of Chemistry journal article supplement (doi:10.1039/d0cc02969f), 2020-01-01
Supplement: d0cc02969f1.pdf [file d0cc02969f1.pdf]

## Supplementary Information

### **One-pot imine synthesis from methylarenes and anilines under air over heterogeneous Cu oxide-modified CeO<sub>2</sub> catalyst**

Masazumi Tamura<sup>\*a</sup>, Yingai Li<sup>b</sup> and Keiichi Tomishige<sup>b</sup>

<sup>a</sup>Research Center for Artificial Photosynthesis, Advanced Research Institute for Natural Science and Technology, Osaka City University, 3-3-138, Sugimoto, Sumiyoshi-ku, Osaka, 558-8585, Japan

<sup>b</sup>Department of Applied Chemistry, School of Engineering, Tohoku University, 6-6-07, Aoba, Aramaki, Aoba-ku, Sendai 980-8579, Japan

\*Email: [mtamura@osaka-cu.ac.jp](mailto:mtamura@osaka-cu.ac.jp)

## Experimental

### General

The GC (Shimadzu Corporation, GC-2014)) and GCMS (Shimadzu Corporation, QP2010) analyses were carried out with a CPSil-5 capillary column (GL Sciences Inc.) using nitrogen as the carrier gas. All the chemicals for organic reactions were analytic reagents from chemical product corporations and were used without further purification.

### Catalyst

CeO<sub>2</sub> was prepared by calcining cerium oxide HS (Daiichi Kigenso, Japan) for 3 hours under air at 873 K. The specific surface area (BET method) of CeO<sub>2</sub> was 84 m<sup>2</sup>/g. The purity of CeO<sub>2</sub> is 99.97%. Other metal oxides were commercially available or supplied from the Catalysis Society of Japan: ZrO<sub>2</sub> (Daiichi Kigenso Kogyo Co. Ltd., Zr(OH)<sub>2</sub> was calcined under air at 673 K for 3 h.), MgO (Ube Industries, Ltd., MgO 500A), TiO<sub>2</sub> (Nippon Aerosil Co. Ltd., P-25), γ-Al<sub>2</sub>O<sub>3</sub> (Nippon Aerosil Co. Ltd.), SiO<sub>2</sub> (Fuji Silysia Chemical Ltd., G-6 was calcined under air at 773 K for 1 h.), SiO<sub>2</sub>-Al<sub>2</sub>O<sub>3</sub> (JRC-SAL-3), Ta<sub>2</sub>O<sub>5</sub> (Wako Pure Chemical Industries Ltd.), La<sub>2</sub>O<sub>3</sub> (Soekawa Chemicals), ZnO (Finex-50, Sakai Chemicals), CaO (Soekawa Chemicals), MnO<sub>2</sub> (Sigma-Aldrich), Nb<sub>2</sub>O<sub>5</sub> (Companhia Brasileira de Metalurgia e Mineracao (CBMM), Nb<sub>2</sub>O<sub>5</sub>·nH<sub>2</sub>O was calcined at 773 K 3h). Pr<sub>6</sub>O<sub>11</sub>, Dy<sub>2</sub>O<sub>3</sub> and Y<sub>2</sub>O<sub>3</sub> were prepared by the precipitation method. Pr(NO<sub>3</sub>)<sub>3</sub>·nH<sub>2</sub>O (Pure Chemical Industries Ltd., >99.5%), Dy(CH<sub>3</sub>COO)<sub>3</sub>·4H<sub>2</sub>O (Pure Chemical Industries Ltd., >99.9%), Y(NO<sub>3</sub>)<sub>3</sub>·nH<sub>2</sub>O (Pure Chemical Industries Ltd., >99.9%) were used as a precursor. A precursor (25 g) was dissolved in water (100 ml) and NH<sub>3</sub>aq (1 M) was dropped with stirring. The pH of the solution was set to 10 and resulted in a precipitate. The precipitate was filtered and washed by water, following a drying at 383 K overnight (12 h) and calcined under air at 873 K for 3 h. The specific surface area of the metal oxides summarized in Table S6.

Metal oxide-modified CeO<sub>2</sub> (MO<sub>x</sub>-CeO<sub>2</sub>, M=Cu, Hf, Co, W, Mn, Mo, Pt, Fe, Zr, Pd, Al, Nb, Ag, Ru, Ni, Pr, Sc, Re, Rh, Ga, Ir, Sn, Y, La, Zn, Nd, Au) catalysts were prepared by impregnation method, and the loading amount of metal species is typically 1 wt%. The typical procedure for CuO<sub>x</sub>-CeO<sub>2</sub> with 1 wt% Cu species is shown below: CuO<sub>x</sub>-CeO<sub>2</sub> catalyst was prepared by impregnating CeO<sub>2</sub> (Daiichi Kigenso Kogyo Co. Ltd., CeO<sub>2</sub>-HS, calcined at 873 K and 3 h in air, 84 m<sup>2</sup>/g) with an aqueous solution of Cu(NO<sub>3</sub>)<sub>2</sub>·3H<sub>2</sub>O (FUJIFILM Wako Pure Chemical Corporation). After evaporating the solvent and drying at 383 K for 12 h, the catalyst was calcined at appropriate temperature (473-1073 K) and 3 h in air. The precursors for other metal species are Hf(CH<sub>3</sub>COCHCOCH<sub>3</sub>)<sub>4</sub> (FUJIFILM Wako Pure Chemical Corporation), Co(NO<sub>3</sub>)<sub>2</sub>·6H<sub>2</sub>O (FUJIFILM Wako Pure Chemical Corporation), (NH<sub>4</sub>)<sub>10</sub>W<sub>12</sub>O<sub>41</sub>·5H<sub>2</sub>O (FUJIFILM Wako Pure Chemical Corporation), Mn(NO<sub>3</sub>)<sub>2</sub>·6H<sub>2</sub>O (FUJIFILM Wako Pure Chemical Corporation), (NH<sub>4</sub>)<sub>6</sub>Mo<sub>7</sub>O<sub>24</sub>·4H<sub>2</sub>O (FUJIFILM Wako Pure Chemical Corporation), [Pt(NH<sub>3</sub>)<sub>4</sub>](NO<sub>3</sub>)<sub>2</sub> (Sigma-

Aldrich Co. LLC),  $\text{Fe}(\text{NO}_3)_3 \cdot 9\text{H}_2\text{O}$  (FUJIFILM Wako Pure Chemical Corporation),  $\text{ZrO}(\text{NO}_3)_2 \cdot 2\text{H}_2\text{O}$  (FUJIFILM Wako Pure Chemical Corporation),  $\text{Pd}(\text{NO}_3)_2\text{aq}$  (4.6 wt%, Sigma-Aldrich Co. LLC),  $\text{Al}(\text{NO}_3)_3 \cdot 9\text{H}_2\text{O}$  (FUJIFILM Wako Pure Chemical Corporation),  $\text{C}_4\text{H}_4\text{NNbO}_9 \cdot x\text{H}_2\text{O}$  (Sigma-Aldrich Co. LLC),  $\text{AgNO}_3$  (FUJIFILM Wako Pure Chemical Corporation),  $\text{Ru}(\text{NO})(\text{NO}_3)_x(\text{OH})_y\text{aq}$  (1.5 wt%, FUJIFILM Wako Pure Chemical Corporation),  $\text{Ni}(\text{NO}_3)_2 \cdot 6\text{H}_2\text{O}$  (FUJIFILM Wako Pure Chemical Corporation),  $\text{Pr}(\text{NO}_3)_3 \cdot 6\text{H}_2\text{O}$  (Kanto Chemical Co., Inc.),  $\text{Sc}(\text{NO}_3)_3 \cdot 5\text{H}_2\text{O}$  (FUJIFILM Wako Pure Chemical Corporation),  $(\text{NH}_4)\text{ReO}_4$ ,  $\text{Rh}(\text{NO}_3)_3\text{aq}$ ,  $\text{Ga}(\text{NO}_3)_3 \cdot n\text{H}_2\text{O}$  (FUJIFILM Wako Pure Chemical Corporation),  $\text{Ir}(\text{NO}_3)_4\text{aq}$  (FURUYA METAL Co., Ltd.),  $\text{C}_{10}\text{H}_{14}\text{O}_4\text{Sn}$  (FUJIFILM Wako Pure Chemical Corporation),  $\text{Y}(\text{NO}_3)_3 \cdot n\text{H}_2\text{O}$  (FUJIFILM Wako Pure Chemical Corporation),  $\text{La}(\text{NO}_3)_3 \cdot 6\text{H}_2\text{O}$  (FUJIFILM Wako Pure Chemical Corporation),  $\text{Zn}(\text{NO}_3)_2 \cdot 6\text{H}_2\text{O}$  (FUJIFILM Wako Pure Chemical Corporation),  $\text{Nd}(\text{NO}_3)_3 \cdot 6\text{H}_2\text{O}$  (FUJIFILM Wako Pure Chemical Corporation),  $\text{HAuCl}_4 \cdot 4\text{H}_2\text{O}$  (FUJIFILM Wako Pure Chemical Corporation).

### **Imine formation from aniline and mesitylene**

A typical procedure for the imine formation from aniline and mesitylene is as follows: Metal oxide catalyst (50 mg) was added to the mixture of aniline (1.0 mmol, Tokyo Chemical Industry Co., Ltd., >98%) and mesitylene (1.5 g, FUJIFILM Wako Pure Chemical Corporation, >97%) in a reaction vessel under air. The resulting mixture was vigorously stirred at 800 rpm at 393 K. After the reaction, the reaction mixture was diluted with methanol, filtrated and transferred to a vial. Details of the reaction conditions are described in each result. The products were analyzed using GC. Conversion and yield of the imine products were determined based on aniline by GC using dodecane (~0.2 g, Tokyo Chemical Industry Co., Ltd., >99%) as an internal standard. Conversion and selectivity were calculated on aniline basis. Products were also identified using standard compounds and GC-MS. The typical GC chart for the imine synthesis from mesitylene and aniline over  $\text{CuO}_x\text{-CeO}_2$  after 24 h is shown in Figure S3.

Reusability test of  $\text{CuO}_x\text{-CeO}_2$  is conducted as follows: the catalyst is retrieved from the reaction mixture by filtration. For each successive use, the catalyst was washed with methanol (5 ml) three times to remove the substrate and products, followed by drying in air at 383 K for 12 h. After this treatment, the obtained catalyst was tested for the next reaction.

### **BET, XRD, ICP-AES and TEM analyses**

The surface area of metal oxides and metal oxide and  $\text{CuO}_x\text{-CeO}_2$  catalysts was measured with BET method ( $\text{N}_2$  adsorption) using Gemini (Micromeritics). X-ray diffraction (XRD) patterns were recorded by Rigaku MiniFlex-600 with  $\text{Cu K}\alpha$  (40 kV, 40 mA) radiation. The amount of eluted metal into the reaction solution was analyzed by inductively-coupled plasma atomic emission

spectrometry (ICP-AES, Thermo Fisher Scientific iCAP 6500). The sample for the ICP was obtained by removing the  $\text{CeO}_2$  from the reaction mixture by filtration. Scanning transmission electron microscopy (STEM) and STEM-EDX images were recorded on a JEM-ARM200F electron microscope (JEOL, Japan) at an acceleration voltage of 200 kV. The Cs-corrector CESCOR (CEOS GmbH, Germany) was used in the STEM mode.

## Tables and figures

**Table S1.** Effect of calcination temperature of  $\text{CuO}_x\text{-CeO}_2$  catalysts in the direct imine formation from mesitylene and aniline.

| Entry | Calcination<br><i>T</i> /K | Specific surface area<br>/m <sup>2</sup> g <sup>-1</sup> | Conv.<br>/% | Imine yield<br>/% | Selectivity /% |            |              |        |
|-------|----------------------------|----------------------------------------------------------|-------------|-------------------|----------------|------------|--------------|--------|
|       |                            |                                                          |             |                   | Imine          | Azobenzene | Azoxybenzene | Others |
| 1     | 473                        | (81)                                                     | 16          | 13                | 82             | 10         | 6            | 2      |
| 2     | 573                        | (80)                                                     | 15          | 12                | 80             | 10         | 6            | 3      |
| 3     | 673                        | 78                                                       | 15          | 13                | 86             | 9          | 3            | 1      |
| 4     | 773                        | 79                                                       | 13          | 11                | 85             | 10         | 4            | 1      |
| 5     | 873                        | 77                                                       | 12          | 11                | 87             | 10         | 3            | <1     |
| 6     | 973                        | 75                                                       | 10          | 8                 | 81             | 13         | 6            | <1     |
| 7     | 1073                       | 58                                                       | 10          | 9                 | 86             | 11         | 3            | <1     |

Reaction conditions: aniline 1 mmol, mesitylene 1.5 g,  $\text{CuO}_x\text{-CeO}_2$  (Cu: 2 wt%) 50 mg, air, 393 K, 24 h.

Conversion and selectivity are calculated on aniline basis.

**Table S2.** Effect of reaction temperature in the direct imine formation from mesitylene and aniline over CuO<sub>x</sub>-CeO<sub>2</sub> (673 K, 3 h) catalyst

| Entry | Reaction temp. | Conv. /% | Imine yield /% | Selectivity /% |            |              |        |
|-------|----------------|----------|----------------|----------------|------------|--------------|--------|
|       |                |          |                | Imine          | Azobenzene | Azoxybenzene | Others |
| 1     | 373            | 2        | 1              | 44             | 41         | 16           | <1     |
| 2     | 383            | 6        | 5              | 72             | 20         | 8            | <1     |
| 3     | 393            | 15       | 13             | 86             | 11         | 3            | 1      |
| 4     | 403            | 27       | 24             | 89             | 10         | 3            | 1      |
| 5     | 413            | 51       | 47             | 92             | 4          | 2            | 3      |

Reaction conditions: aniline 1 mmol, mesitylene 1.5 g, CuO<sub>x</sub>-CeO<sub>2</sub> (Cu: 2 wt%, calcined at 673 K for 3 h) 50 mg, air, 24 h. Conversion and selectivity are calculated on aniline basis.

**Table S3.** Details of the time-course of the direct imine formation from mesitylene and aniline over CuO<sub>x</sub>-CeO<sub>2</sub> catalyst (Figure 4(a)).

| Reaction time<br>/h | Conv.<br>/% | Imine yield<br>/% | Selectivity /% |            |              |        | Formation amount /mmol |                           |
|---------------------|-------------|-------------------|----------------|------------|--------------|--------|------------------------|---------------------------|
|                     |             |                   | Imine          | Azobenzene | Azoxybenzene | Others | Imine                  | 3,5-Dimethyl benzaldehyde |
| 0                   | 0           | 0                 | -              | -          | -            | -      | 0                      | 0                         |
| 4                   | 12          | 10                | 82             | 7          | 3            | 8      | 0.10                   | 0.03                      |
| 7                   | 22          | 20                | 88             | 5          | 2            | 5      | 0.20                   | 0.01                      |
| 24                  | 51          | 47                | 92             | 4          | 2            | 3      | 0.47                   | 0.03                      |
| 48                  | 76          | 71                | 93             | 3          | 2            | 3      | 0.71                   | 0.04                      |
| 72                  | 92          | 84                | 91             | 2          | 2            | 5      | 0.84                   | 0.06                      |
| 96                  | 97          | 91                | 93             | 2          | 2            | 2      | 0.91                   | 0.07                      |
| 120                 | >99         | 93                | 93             | 3          | 3            | 2      | 0.93                   | 0.09                      |
| 160                 | >99         | 93                | 93             | 2          | 2            | 2      | 0.93                   | 0.18                      |

Reaction conditions: aniline 1 mmol, mesitylene 1.5 g, CuO<sub>x</sub>-CeO<sub>2</sub> (Cu: 2 wt%, 673 K) 50 mg, air, 413 K.

Conversion and selectivity are calculated on aniline basis.

**Table S4.** Scope of aryl compounds and anilines in the direct imine formation over CuO<sub>x</sub>-CeO<sub>2</sub> catalyst<sup>a</sup>

| Entry | Aryl compound                                                                      | Amine                                                                              | Product                                                                            | <i>t</i> /h | Conv. /% | Sel. /% |
|-------|------------------------------------------------------------------------------------|------------------------------------------------------------------------------------|------------------------------------------------------------------------------------|-------------|----------|---------|
| 1     |   |   |   | 168         | 99       | 93      |
| 2     |   |   |   | 120         | 91       | 96      |
| 3     |   |   |   | 120         | 94       | 91      |
| 4     |   |   |   | 96          | 97       | 97      |
| 5     |   |   |   | 96          | 97       | 92      |
| 6     |   |   |   | 168         | 91       | 91      |
| 7     |   |   |   | 168         | 95       | 93      |
| 8     |  |  |  | 216         | 93       | 92      |

Reaction conditions: amine 1 mmol, aryl compound 1.5 g, CuO<sub>x</sub>-CeO<sub>2</sub> (Cu: 2 wt%, 673 K) 50 mg, air, 413 K. <sup>a</sup>Conversion and selectivity are calculated on amine basis.



**Table S5.** Direct imine formation from mesitylene and aniline with various catalyst combinations

| Entry | Catalyst                                  | Conv.<br>/% | 1 yield<br>/% | Selectivity/% |            |              |        |
|-------|-------------------------------------------|-------------|---------------|---------------|------------|--------------|--------|
|       |                                           |             |               | 1             | Azobenzene | Azoxybenzene | Others |
| 1     | CeO <sub>2</sub>                          | 25          | 10            | 39            | 50         | 9            | 2      |
| 2     | CuO <sub>x</sub> -CeO <sub>2</sub>        | 15          | 13            | 86            | 9          | 3            | 1      |
| 3     | CeO <sub>2</sub> +1 wt% CuO               | 21          | 10            | 51            | 33         | 17           | 1      |
| 4     | CeO <sub>2</sub> +1 wt% Cu <sub>2</sub> O | 23          | 12            | 53            | 29         | 18           | 1      |
| 5     | Cu <sub>2</sub> O                         | <1          | <1            | -             | -          | -            | -      |
| 6     | CuO                                       | <1          | <1            | -             | -          | -            | -      |

Reaction conditions: aniline 1 mmol, mesitylene 1.5 g, CuO<sub>x</sub>-CeO<sub>2</sub> (Cu: 2 wt%, 673 K), CuO or Cu<sub>2</sub>O 50 mg, air, 393 K, 24 h.

**Table S6.** Specific surface area of used metal oxides

| Entry | Metal oxide                                      | Specific surface area<br>/ m <sup>2</sup> g <sup>-1</sup> |
|-------|--------------------------------------------------|-----------------------------------------------------------|
| 1     | CeO <sub>2</sub>                                 | 84                                                        |
| 2     | MnO <sub>2</sub>                                 | 28                                                        |
| 3     | Pr <sub>6</sub> O <sub>11</sub>                  | 20                                                        |
| 4     | MgO                                              | 37                                                        |
| 5     | Y <sub>2</sub> O <sub>3</sub>                    | 51                                                        |
| 6     | Eu <sub>2</sub> O <sub>3</sub>                   | 5.7                                                       |
| 7     | Sm <sub>2</sub> O <sub>3</sub>                   | 38                                                        |
| 8     | Al <sub>2</sub> O <sub>3</sub>                   | 164                                                       |
| 9     | ZnO                                              | 66                                                        |
| 10    | ZrO <sub>2</sub>                                 | 46                                                        |
| 11    | Nb <sub>2</sub> O <sub>5</sub>                   | 40                                                        |
| 12    | TiO <sub>2</sub>                                 | 55                                                        |
| 13    | La <sub>2</sub> O <sub>3</sub>                   | 28                                                        |
| 14    | CaO                                              | 12                                                        |
| 15    | SiO <sub>2</sub> -Al <sub>2</sub> O <sub>3</sub> | 560                                                       |
| 16    | SiO <sub>2</sub>                                 | 432                                                       |

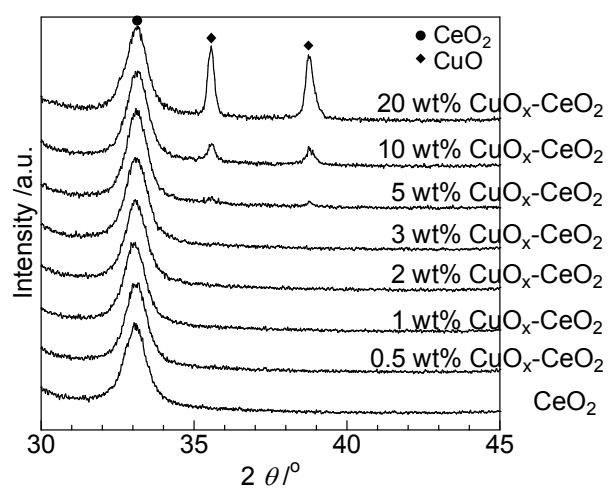

**Figure S1.** Expanded XRD patterns of  $\text{CuO}_x\text{-CeO}_2$  and  $\text{CeO}_2$  catalysts

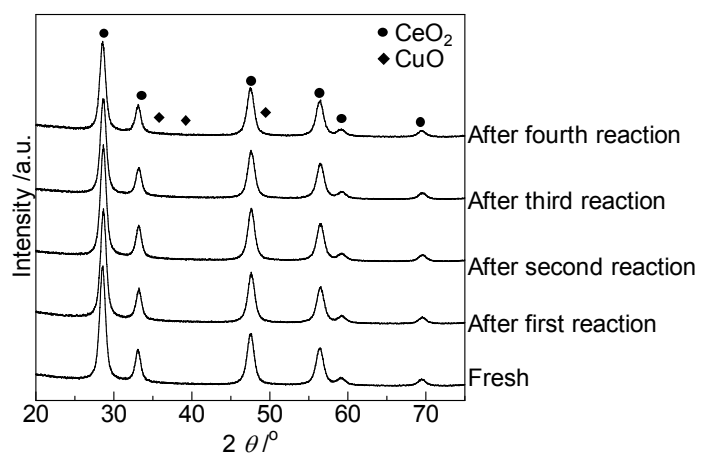

**Figure S2.** XRD patterns of CuO<sub>x</sub>-CeO<sub>2</sub> (Cu: 2 wt%, 673 K) catalysts before and after reaction.

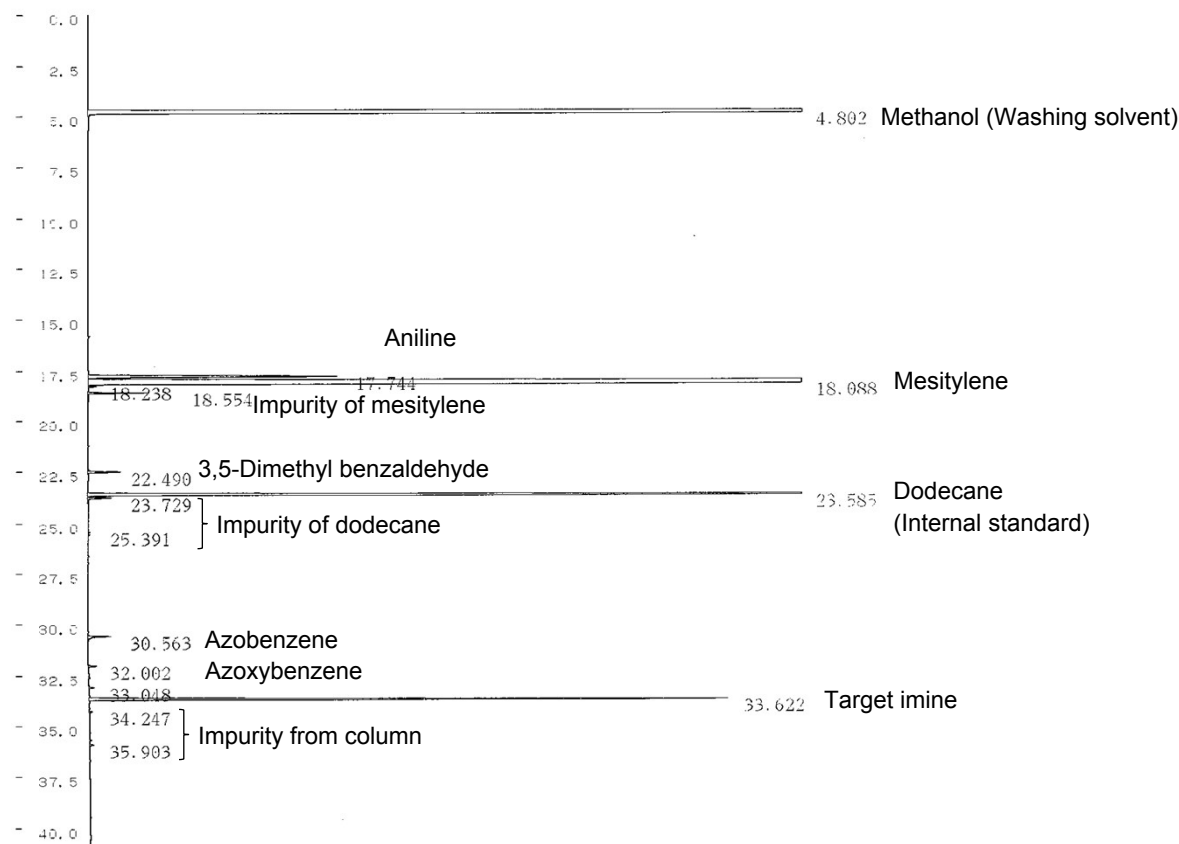

## \*\* CALCULATION REPORT \*\*

| CH    | PKNO | TIME   | AREA    | HEIGHT  | MK | IDNO | CONC    | NAME |
|-------|------|--------|---------|---------|----|------|---------|------|
| 1     | 2    | 4.802  | 5907173 | 844355  | S  |      | 72.4737 |      |
|       | 7    | 17.744 | 57375   | 11189   | V  |      | 0.7039  |      |
|       | 8    | 18.088 | 1856249 | 248073  | V  |      | 22.7739 |      |
|       | 9    | 18.238 | 969     | 391     | V  |      | 0.0119  |      |
|       | 11   | 18.554 | 6633    | 2651    | SV |      | 0.0814  |      |
|       | 17   | 22.49  | 4249    | 1452    | V  |      | 0.0521  |      |
|       | 22   | 23.585 | 203769  | 61949   | V  |      | 2.5     |      |
|       | 23   | 23.729 | 3354    | 1076    | SV |      | 0.0411  |      |
|       | 30   | 25.391 | 312     | 106     | V  |      | 0.0038  |      |
|       | 43   | 30.563 | 3562    | 1006    | V  |      | 0.0437  |      |
|       | 45   | 32.002 | 1131    | 366     |    |      | 0.0139  |      |
|       | 50   | 33.048 | 822     | 239     | V  |      | 0.0101  |      |
|       | 52   | 33.622 | 103983  | 28630   | V  |      | 1.2757  |      |
|       | 56   | 34.247 | 504     | 134     |    |      | 0.0062  |      |
|       | 61   | 35.903 | 702     | 198     |    |      | 0.0086  |      |
| TOTAL |      |        | 8150781 | 1201813 |    |      | 100     |      |

**Figure S3.** GC chart of the reaction mixture with  $\text{CuO}_x\text{-CeO}_2$  (Cu: 2 wt%, 673 K) catalyst after 24 h.

Reaction conditions: aniline 1 mmol, mesitylene 1.5 g,  $\text{CuO}_x\text{-CeO}_2$  (Cu: 2 wt%, 673 K) 50 mg, air, 413 K, 24 h.

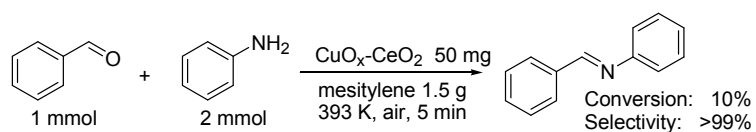

**Scheme S1.** Imine formation from benzaldehyde and aniline over  $\text{CuO}_x\text{-CeO}_2$  catalyst (Cu: 2 wt%, 673 K)

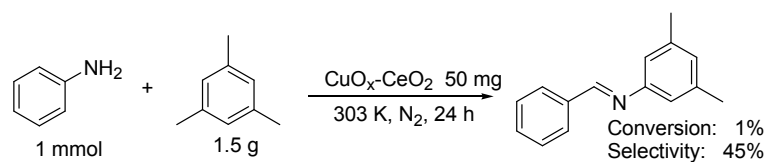

**Scheme S2.** Imine formation from mesitylene and aniline under  $\text{N}_2$  with  $\text{CuO}_x\text{-CeO}_2$  (Cu: 2 wt%, 673 K) catalyst

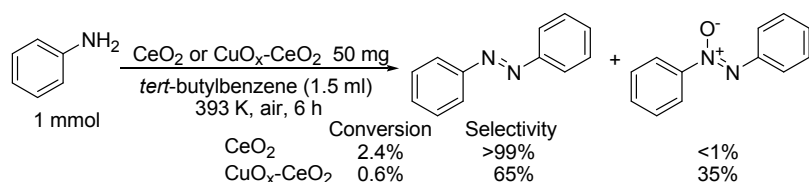

**Scheme S3.** Coupling reaction of aniline over  $\text{CeO}_2$  and  $\text{CuO}_x\text{-CeO}_2$  (Cu: 2 wt%, 673 K) catalysts.
